# Supplementary material
Source: MDPI journal article supplement (https://www.mdpi.com/2673-4125/1/4/28)
Supplement: s1 [file s1 › biophysica-1368107-supplementary.pdf]

**Supplemental Information** for

**Mechanistic insights into the inhibition of SARS-CoV-2 main protease by clovamide and its derivatives: in silico studies**

Naike Ye, Francesco Caruso, Miriam Rossi\*

Department of Chemistry, Vassar College, Poughkeepsie, NY 12604, USA

\* Corresponding Author: [rossi@vassar.edu](mailto:rossi@vassar.edu) (M.R.)

**Figure S1**

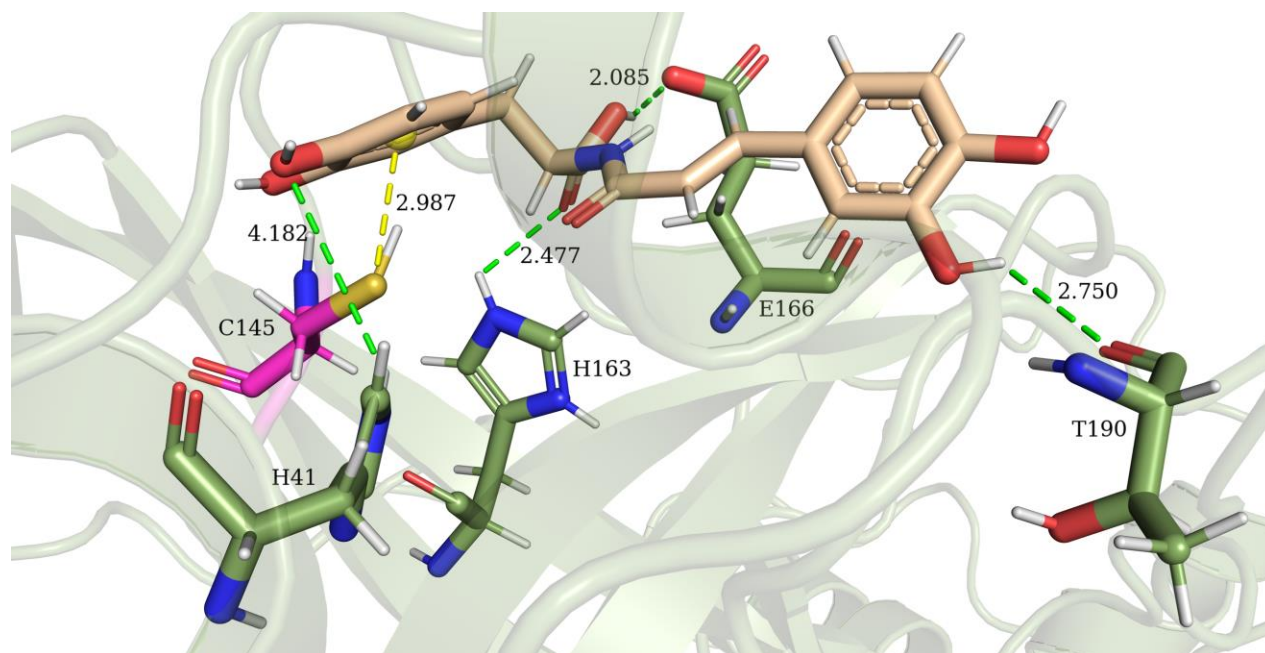

**Figure S1.** Pose 1 of the docking poses of clovamide to M<sup>pro</sup> (PDB: 6LU7). S(C145) points to the catechol ring with an atom-to-centroid distance of 2.987 Å (yellow dash line), a strong interaction providing both stability to the complex and potentials for covalent reactions. Green dash lines represent hydrogen bonds providing non-covalent stabilizations towards the complex.

**Figure S2**

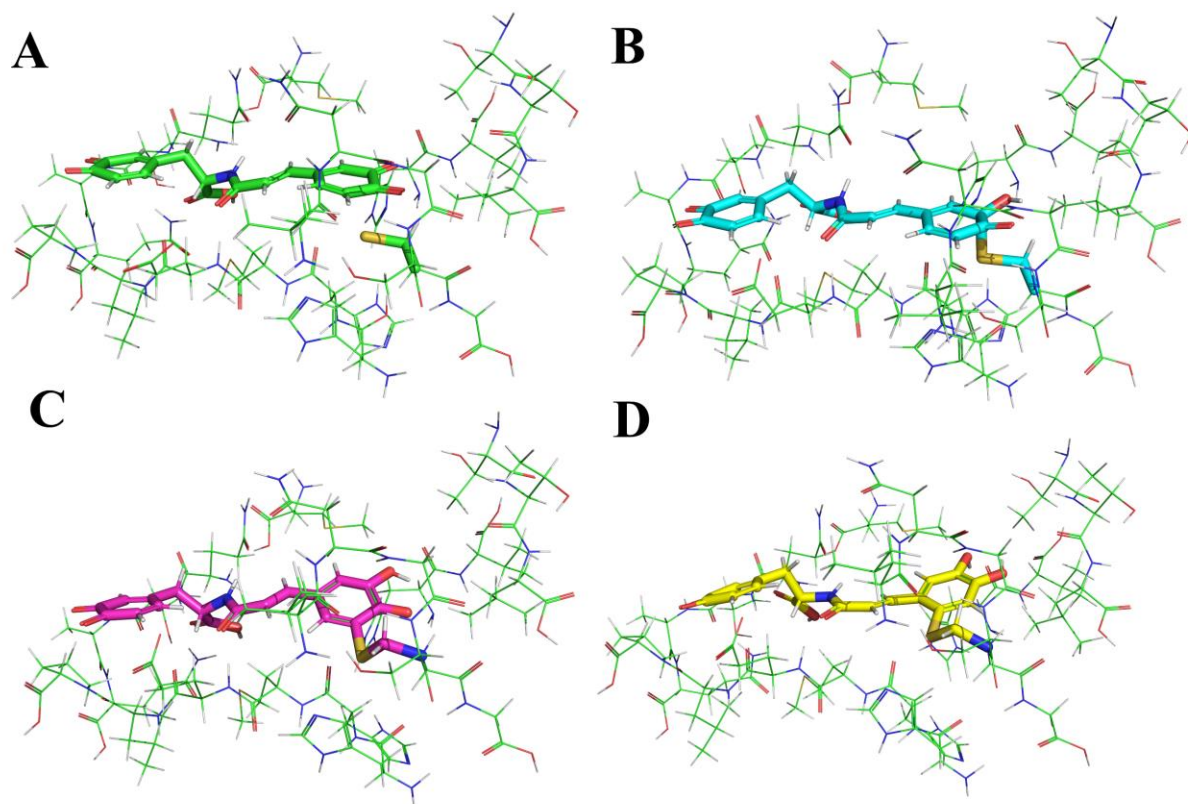

**Figure S3**

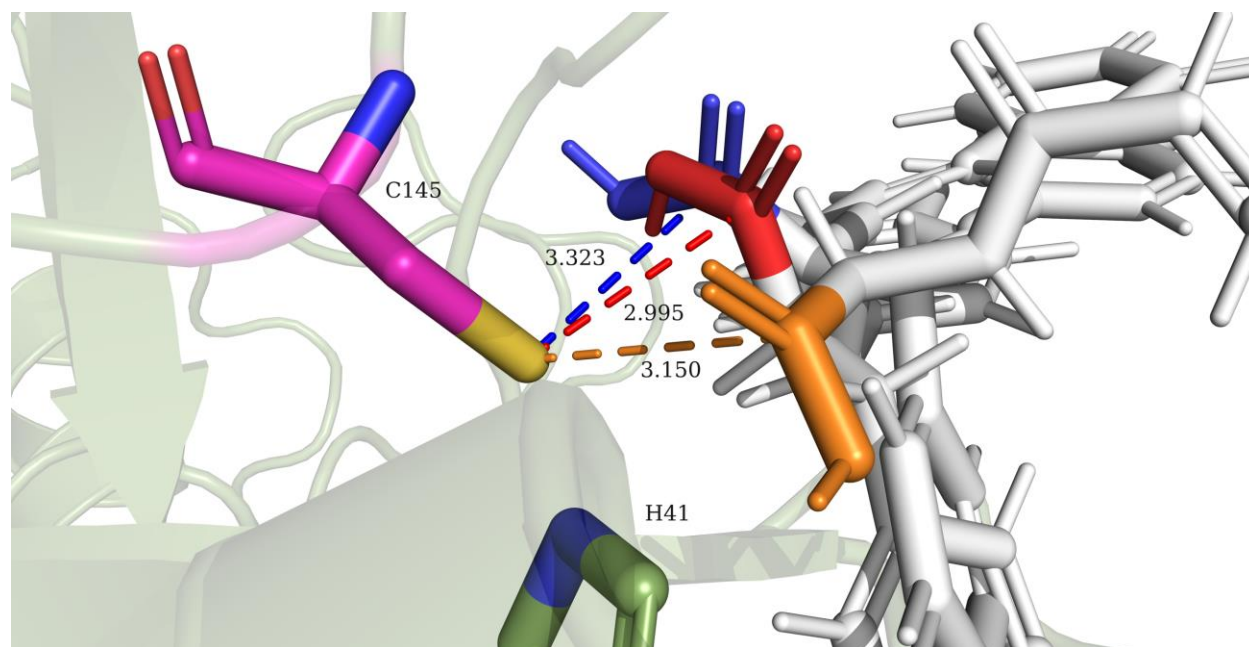

**Figure S3.** Potential thioester linkage formation by S(C145) attacking the carbonyl carbon of carboxylic acid groups. Protein hydrogen atoms are omitted; for substrates, only the carboxylic acid groups are colored for clarity. Orange compound is docking pose 12 of clovamide to M<sup>pro</sup>; red compound is docking pose 3 of clovamide quinone derivative **B** to M<sup>pro</sup>; blue compound is docking pose 1 of clovamide quinone derivative **C** to M<sup>pro</sup>. Labels show distances between S(C145) to the carbonyl carbons of the acid groups.

**Figure S4**

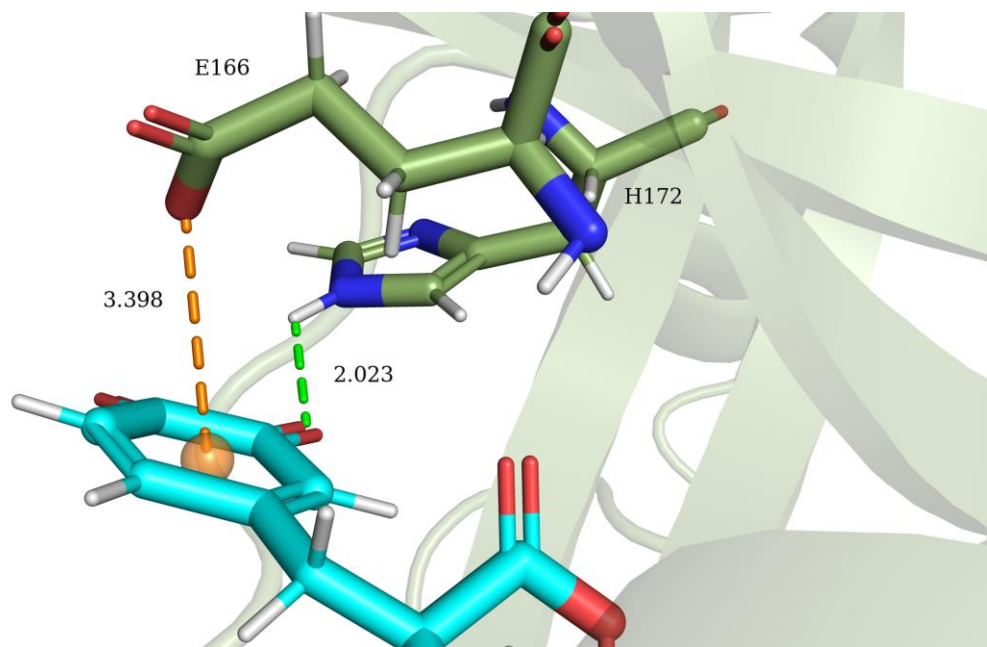

**Figure S4.** The  $\pi$ —anion interaction. This interaction (represented by orange dashed line) occurs between at the terminal of the negatively charged E166 residue and the  $\pi$  system of the ortho-quinone ring. The interaction distance is 3.398 Å. Green dash represents a strong hydrogen bond between quinone carbonyl oxygen and H172 residue.

**Figure S5**

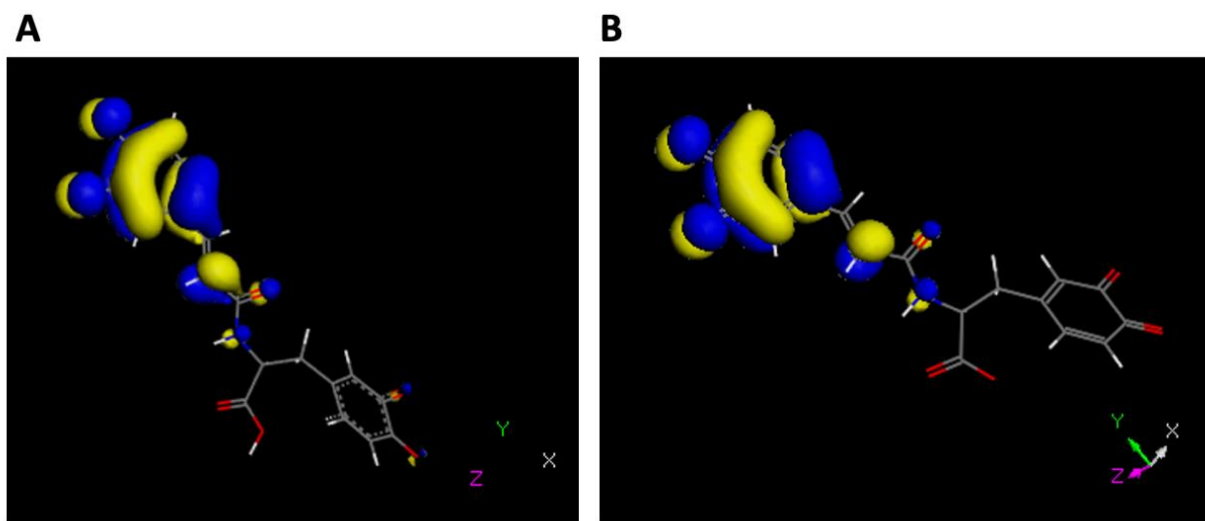

**Figure S5.** LUMO for the clovamide quinone derivative C, indicating reactivity at the ortho-quinone ring at the side with double-bond conjugation. **A:** natural molecule of clovamide derivative C; **B:** anionic form with deprotonated carboxylate group, total charge is -1.

**Table S1:** DFT geometry optimization free energy for the reactant and products of inhibition by clovamide quinone derivative. See Scheme 3 for mechanistic details

| Mechanism                                          | Structure of reactant/product                                                       | Energy (Hartree) | Energy (kJ/mol) |
|----------------------------------------------------|-------------------------------------------------------------------------------------|------------------|-----------------|
| <b>Reactant</b><br>(thiolate C145)                 | 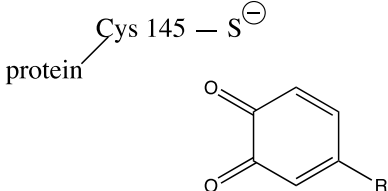   | -10861.731       | -28517476.548   |
| <b>Mechanism A1</b><br>(carbonyl carbon addition)  | 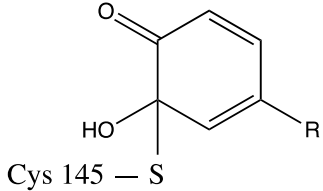   | -10861.711       | -28517424.402   |
| <b>Mechanism A2</b><br>( $\alpha$ carbon addition) | 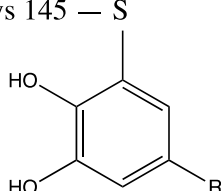  | -10862.134       | -28518534.989   |
| <b>Mechanism A3</b><br>( $\beta$ carbon addition)  | 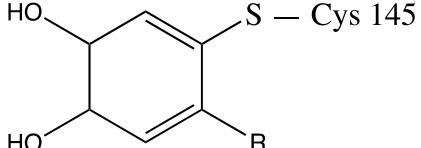 | -10862.067       | -28518359.081   |
